# Supplementary material for: Exome sequencing reveals a high prevalence of BRCA1 and BRCA2 founder variants in a diverse population-based biobank
Source: PubMed Central journal article supplement (PMC6938627; doi:10.1186/s13073-019-0691-1), 2019-12-31
Supplement: 13073_2019_691_MOESM1_ESM.pdf [file 13073_2019_691_MOESM1_ESM.pdf]

## ADDITIONAL FILE 1

### Exome Sequencing Reveals a High Prevalence of *BRCA1* and *BRCA2* Founder Variants in a Diverse Population-Based Biobank

Noura S. Abul-Husn<sup>1,2,3,4\*</sup>, Emily R. Soper<sup>1,2†</sup>, Jacqueline A. Odgis<sup>1,2†</sup>, Sinead Cullina<sup>1,2</sup>, Dean Bobo<sup>1,2</sup>, Arden Moscatti<sup>1,2</sup>, Jessica E. Rodriguez<sup>1,2</sup>, CBIPM Genomics team<sup>1,2</sup>, Regeneron Genetics Center<sup>5</sup>, Ruth J.F. Loos<sup>2</sup>, Judy H. Cho<sup>2,3,4</sup>, Gillian M. Belbin<sup>1,2,3</sup>, Sabrina A. Suckiel<sup>1,2</sup>, Eimear E. Kenny<sup>1,2,3,4</sup>

<sup>1</sup>The Center for Genomic Health, Icahn School of Medicine at Mount Sinai, New York, NY

<sup>2</sup>The Charles Bronfman Institute for Personalized Medicine, Icahn School of Medicine at Mount Sinai, New York, NY

<sup>3</sup>Department of Medicine, Icahn School of Medicine at Mount Sinai, New York, NY

<sup>4</sup>Department of Genetics and Genomic Sciences, Icahn School of Medicine at Mount Sinai, New York, NY

<sup>5</sup>Regeneron Genetics Center, Tarrytown, New York, NY

† These authors contributed equally to this work

\*Correspondence: [noura.abul-husn@mssm.edu](mailto:noura.abul-husn@mssm.edu)

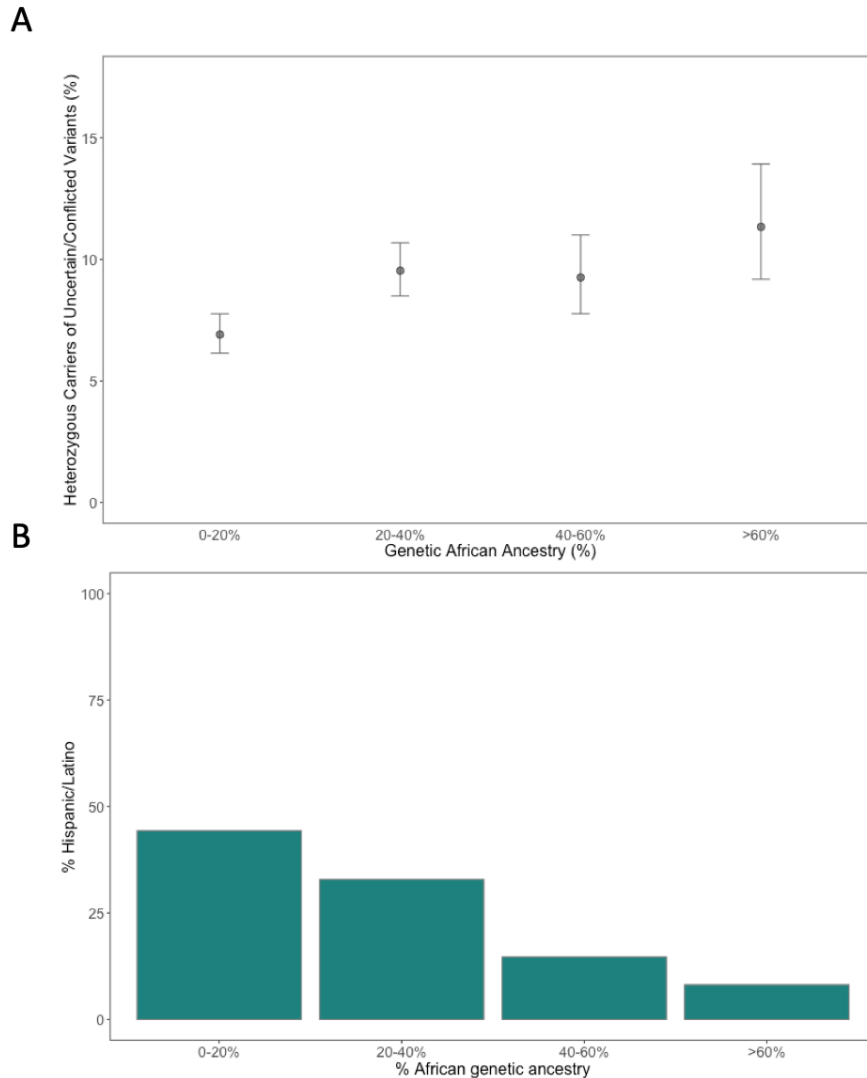

**Figure S1.** Correlation between proportion African genetic ancestry and the likelihood of harboring an uncertain/conflicting *BRCA1/2* variant in Hispanic/Latinos. Among 394 *BRCA1/2* variants identified in unrelated, self-reported Hispanic/Latinos with both exome sequence and GSA genotype data in the BioMe Biobank ( $N = 8457$ ), there were 125 variants of uncertain significance or with conflicting interpretations of pathogenicity in ClinVar (uncertain/conflicting). We examined the proportion of uncertain/conflicting variants in four bins of African genetic ancestry (0-20%, 20-40%, 40-60%, 60-100%) and found a strong correlation (Pearson correlation coefficient 0.96) between higher proportion African genetic ancestry and higher rates of uncertain/conflicting variants (**1A**). Hispanic/Latino participants in the highest African genetic ancestry bin had an almost twofold higher rate of uncertain/conflicting variants (11.3%, 95% CI 9.2-13.9%) compared to those in the lowest bin (6.9%, 95% CI 6.1-7.7%); chi-squared test  $p = 7.8 \times 10^{-5}$ . **1B** shows the breakdown of self-reported Hispanic/Latinos by African genetic ancestry bins; 0-20% ( $N = 3748$ ); >20-40% ( $N = 2779$ ); >40-60% ( $N = 1242$ ); >60% ( $N = 688$ ).

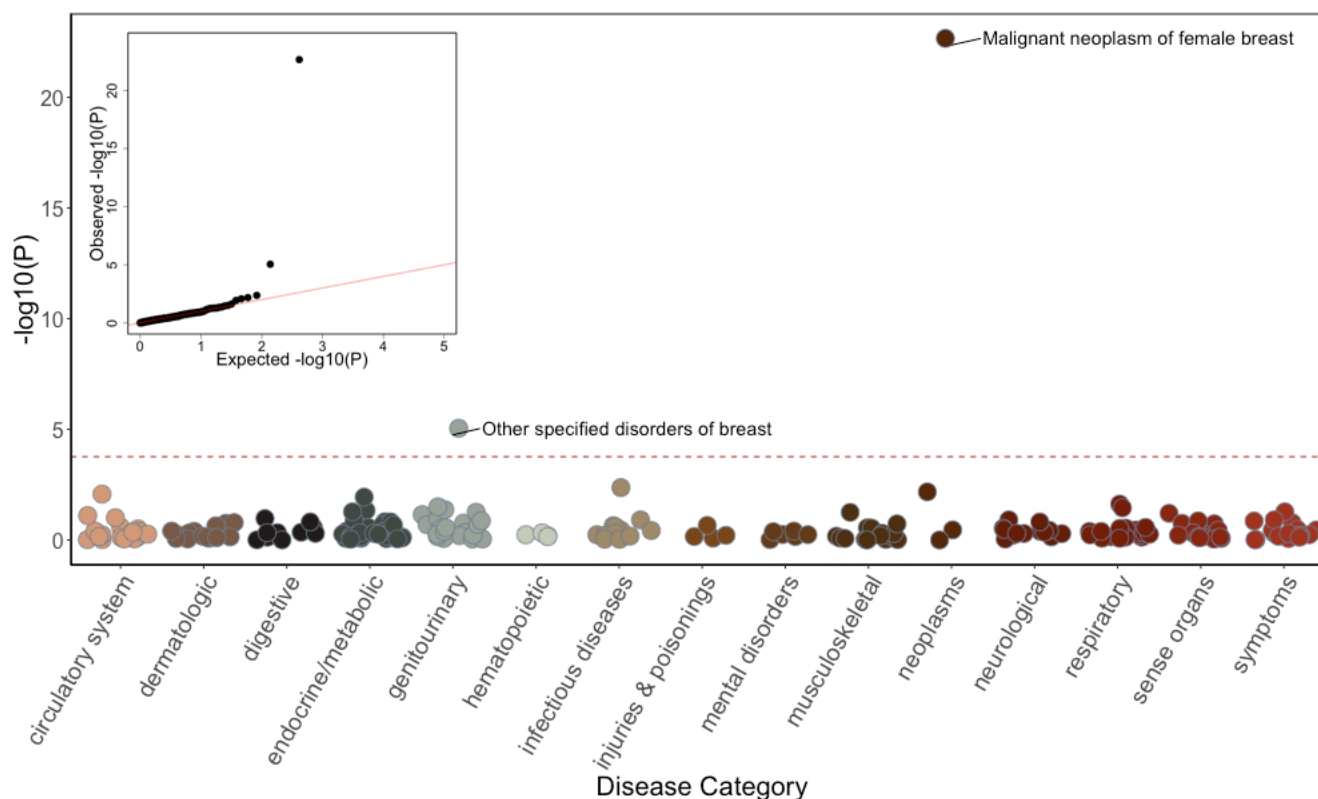

**Figure S2.** Phenome-wide association study of *BRCA1/2* variant-positive vs. variant-negative participants using EHR-derived clinical diagnoses (phecodes). We restricted analyses to phecodes present in at least 5 variant-positive participants, resulting in a total of 260 tests. Logistic regression was performed adjusting for age, sex, and the first 5 principal components. Using a Bonferroni adjusted significance threshold of  $p < 1.9 \times 10^{-4}$ , we identified two significant associations of variant-positive participants with “Malignant neoplasm of female breast” (OR 8.1; 95% CI 5.4 to 12.2;  $p = 2.2 \times 10^{-23}$ ) and “Other specified disorders of breast” (OR 6.9; 95% CI 2.9 to 16.2;  $p = 9.0 \times 10^{-6}$ ).

**Table S1.** International Classification of Diseases (ICD)-9 and -10 codes used to characterize *BRCA1/2* variant-positive individuals.

| Personal and Family Medical History |                               | ICD-9 Codes                | ICD-10 Codes                 | Definition                                                                                    |
|-------------------------------------|-------------------------------|----------------------------|------------------------------|-----------------------------------------------------------------------------------------------|
| Personal History                    | Breast cancer                 | 174.*, 175.*, 233.0, V10.3 | C50.*, D05.*, Z85.3, Z86.000 | Current or past diagnosis of invasive and/or in situ carcinoma of the breast (male or female) |
|                                     | Ovarian cancer                | 183.*, V10.43              | C56.*, C57.0*, Z85.43        | Current or past diagnosis of carcinoma of the ovary                                           |
|                                     | Prostate cancer               | 185.*, 233.4, V10.46       | C61, Z85.46, D07.5           | Current or past diagnosis of carcinoma of the prostate                                        |
|                                     | Pancreatic cancer             | 157.*                      | C25.*, Z85.07                | Current or past diagnosis of carcinoma of the pancreas                                        |
|                                     | Melanoma                      | 172.*, V10.82              | C43*, Z85.820                | Current or past diagnosis of cutaneous melanoma                                               |
|                                     | Prior Genetic Testing         | V84.01, V84.02, V84.03     | Z15.01, Z15.02, Z15.03       | Genetic susceptibility to breast, ovary or prostate                                           |
| Family History                      | Breast cancer                 | V16.3                      | Z80.3                        | Family history of breast cancer                                                               |
|                                     | Ovarian cancer                | V16.41                     | Z80.41                       | Family history of ovarian cancer                                                              |
|                                     | Prostate cancer               | V16.42                     | Z80.42                       | Family history of prostate cancer                                                             |
|                                     | Gastrointestinal tract cancer | V16.0                      | Z80.0                        | Family history of cancer of the gastrointestinal tract (including pancreas)                   |
|                                     | Prior Genetic Testing         | V18.9                      | Z84.81                       | Family history of genetic disease                                                             |

**Table S2.** Distribution of 1601 *BRCA1/2* variants obtained from exome sequence data available from 30,223 adult BioMe Biobank participants, according to ClinVar assertion and variant type.

| <b>ClinVar Assertion</b>                                                                                                                                                                                                          | <b><i>BRCA1</i>, N (%)</b> | <b><i>BRCA2</i>, N (%)</b> | <b><i>BRCA1/2</i>, N (%)</b> |
|-----------------------------------------------------------------------------------------------------------------------------------------------------------------------------------------------------------------------------------|----------------------------|----------------------------|------------------------------|
| Pathogenic/Likely Pathogenic                                                                                                                                                                                                      | 31 (5.6)                   | 71 (6.8)                   | 102 (6.4)                    |
| Uncertain Significance                                                                                                                                                                                                            | 174 (31.4)                 | 356 (34.0)                 | 530 (33.1)                   |
| Conflicting Interpretations                                                                                                                                                                                                       | 27 (4.9)                   | 78 (7.5)                   | 105 (6.6)                    |
| Benign/Likely Benign                                                                                                                                                                                                              | 238 (42.9)                 | 360 (34.4)                 | 598 (37.4)                   |
| NA                                                                                                                                                                                                                                | 85 (15.3)                  | 181 (17.3)                 | 266 (16.6)*                  |
| <b>Variant Type<sup>#</sup></b>                                                                                                                                                                                                   |                            |                            |                              |
| Frameshift                                                                                                                                                                                                                        | 12 (2.2)                   | 44 (4.2)                   | 56 (3.5)                     |
| Missense                                                                                                                                                                                                                          | 361 (65.0)                 | 655 (62.6)                 | 1016 (63.5)                  |
| Stop gained                                                                                                                                                                                                                       | 12 (2.2)                   | 19 (1.8)                   | 31 (1.9)                     |
| Synonymous                                                                                                                                                                                                                        | 150 (27.0)                 | 221 (21.1)                 | 371 (23.2)                   |
| NA                                                                                                                                                                                                                                | 20 (3.6)                   | 107 (10.2)                 | 127 (7.9)                    |
| <b>Total</b>                                                                                                                                                                                                                      | <b>555</b>                 | <b>1046</b>                | <b>1601</b>                  |
| *10 of the 266 variants with no ClinVar assertions were predicted loss-of-function variants (frameshift or stop gained) and were included in the set of expected pathogenic variants used to define variant-positive individuals. |                            |                            |                              |
| <sup>#</sup> Consequence based on Variant Effect Predictor annotation.                                                                                                                                                            |                            |                            |                              |

**Table S3. BRCA1/2 expected pathogenic variants identified in 30,223 exome sequenced adults from the BioMe Biobank.**

| CHR:POS:REF:ALT     | Gene  | Function    | rsID         | cDNA Position      | Protein Position | ClinVar Significance (Review Status) | # Hets | Self-Reported Ancestry (# Hets) | Genetic Ancestry (# Hets)                                        |
|---------------------|-------|-------------|--------------|--------------------|------------------|--------------------------------------|--------|---------------------------------|------------------------------------------------------------------|
| 17:43049191:TG:T    | BRCA1 | Frameshift  | rs80357590   | c.5335delC         | p.Gln1779fs      | Pathogenic (3*)                      | 1      | ESA (1)                         | Filipino and other Southeast Asian (1)                           |
| 17:43051071:A:C     | BRCA1 | Missense    | rs41293463   | c.5324T>G          | p.Met1775Arg     | Pathogenic (3*)                      | 3      | AA (3)                          | African American and African (3)                                 |
| 17:43057062:T:TG    | BRCA1 | Frameshift  | rs80357906   | c.5266dupC         | p.Gln1756fs      | Pathogenic (3*)                      | 6      | EA (6)                          | AJ (5), Non-AJ European (1)                                      |
| 17:43063345:TTTTC:T | BRCA1 | Frameshift  | rs80357867   | c.5177_5180delGAAA | p.Arg1726fs      | Pathogenic (3*)                      | 1      | AA (1)                          |                                                                  |
| 17:43063903:G:T     | BRCA1 | Missense    | rs28897696   | c.5123C>A          | p.Ala1708Glu     | Pathogenic (3*)                      | 1      | EA (1)                          | Non-AJ European (1)                                              |
| 17:43063917:A:C     | BRCA1 | Stop gained | rs80356974   | c.5109T>G          | p.Tyr1703Ter     | Pathogenic (3*)                      | 1      | EA (1)                          | Non-AJ European (1)                                              |
| 17:43071017:TC:T    | BRCA1 | Frameshift  |              | c.4896delG         | p.Ser1633fs      | NA                                   | 1      | EA (1)                          | Non-AJ European (1)                                              |
| 17:43074403:C:A     | BRCA1 | Stop gained | rs80357366   | c.4603G>T          | p.Glu1535Ter     | Pathogenic (3*)                      | 3      | AA (3)                          | African American and African (2)                                 |
| 17:43076559:GC:G    | BRCA1 | Frameshift  | rs1064793951 | c.4412delG         | p.Gly1471fs      | Pathogenic (3*)                      | 1      | HA (1)                          | Colombian (2)                                                    |
| 17:43082434:G:A     | BRCA1 | Stop gained | rs41293455   | c.4327C>T          | p.Arg1443Ter     | Pathogenic (3*)                      | 1      | O (1)                           | Non-AJ European (1)                                              |
| 17:43091443:G:C     | BRCA1 | Stop gained | rs398122680  | c.4088C>G          | p.Ser1363Ter     | Pathogenic (3*)                      | 1      | AA (1)                          | African American and African (1)                                 |
| 17:43091455:T:TGC   | BRCA1 | Frameshift  |              | c.4074_4075dupGC   | p.Gln1359fs      | NA                                   | 1      | ESA (1)                         | Filipino and other Southeast Asian (1)                           |
| 17:43091669:CCTCA:C | BRCA1 | Frameshift  | rs80357842   | c.3858_3861delTGAG | p.Ser1286fs      | Pathogenic (3*)                      | 1      | HA (1)                          | Central and South American (1)                                   |
| 17:43091714:G:A     | BRCA1 | Stop gained | rs80357208   | c.3817C>T          | p.Gln1273Ter     | Pathogenic (3*)                      | 1      | HA (1)                          | Puerto Rican (1)                                                 |
| 17:43091771:TAGAC:T | BRCA1 | Frameshift  | rs80357868   | c.3756_3759delGTCT | p.Ser1253fs      | Pathogenic (3*)                      | 2      | EA (2)                          | Non-AJ European (1)                                              |
| 17:43091924:G:A     | BRCA1 | Stop gained | rs62625308   | c.3607C>T          | p.Arg1203Ter     | Pathogenic (3*)                      | 2      | EA (1), HA (1)                  | Puerto Rican (1)                                                 |
| 17:43092119:C:A     | BRCA1 | Stop gained | rs886040126  | c.3412G>T          | p.Gly1138Ter     | Pathogenic (3*)                      | 1      | AA (1)                          | African American and African (1)                                 |
| 17:43092196:TCTTG:T | BRCA1 | Frameshift  | rs80357701   | c.3331_3334delCAAG | p.Gln1111fs      | Pathogenic (3*)                      | 2      | AA (1), HA (1)                  | African American and African (1), Central and South American (1) |
| 17:43092570:C:CT    | BRCA1 | Frameshift  | rs886040088  | c.2960dupA         | p.Ser988fs       | Pathogenic (3*)                      | 1      | EA (1)                          | Non-AJ European (1)                                              |
| 17:43092615:TC:T    | BRCA1 | Frameshift  | rs80357573   | c.2915delG         | p.Gly972fs       | Pathogenic (3*)                      | 1      | AA (1)                          | African American and African (1)                                 |
| 17:43093055:TG:T    | BRCA1 | Frameshift  | rs80357970   | c.2475delC         | p.Asp825fs       | Pathogenic (3*)                      | 1      | EA (1)                          | AJ (1)                                                           |
| 17:43093496:T:A     | BRCA1 | Stop gained | rs80357082   | c.2035A>T          | p.Lys679Ter      | Pathogenic (3*)                      | 1      | EA (1)                          | Non-AJ European (1)                                              |
| 17:43093950:CTT:C   | BRCA1 | Frameshift  | rs431825387  | c.1579_1580delAA   | p.Lys527fs       | Pathogenic (3*)                      | 1      | EA (1)                          | Non-AJ European (1)                                              |
| 17:43094018:T:A     | BRCA1 | Stop gained | rs397508877  | c.1513A>T          | p.Lys505Ter      | Pathogenic (3*)                      | 1      | HA (1)                          |                                                                  |
| 17:43094451:G:T     | BRCA1 | Stop gained | rs886037986  | c.1080C>A          | p.Cys360Ter      | Pathogenic (3*)                      | 1      | EA (1)                          | Non-AJ European (1)                                              |
| 17:43094472:C:T     | BRCA1 | Stop gained | rs80356935   | c.1059G>A          | p.Trp353Ter      | Pathogenic (3*)                      | 1      | O (1)                           | Non-AJ European (1)                                              |
| 17:43104260:A:C     | BRCA1 | Stop gained | rs80356936   | c.303T>G           | p.Tyr101Ter      | Pathogenic (3*)                      | 1      | AA (1)                          | African American and African (1)                                 |

| CHR:POS:REF:ALT        | Gene  | Function    | rsID         | cDNA Position         | Protein Position | ClinVar Significance (Review Status) | # Hets | Self-Reported Ancestry (# Hets) | Genetic Ancestry (# Hets)                                |
|------------------------|-------|-------------|--------------|-----------------------|------------------|--------------------------------------|--------|---------------------------------|----------------------------------------------------------|
| 17:43106457:T:C        | BRCA1 | Missense    | rs80357382   | c.211A>G              | p.Arg71Gly       | Pathogenic (2*)                      | 3      | HA (2), ESA (1)                 | Puerto Rican (2), Filipino and other Southeast Asian (1) |
| 17:43106478:A:C        | BRCA1 | Missense    | rs80357064   | c.190T>G              | p.Cys64Gly       | Pathogenic (2*)                      | 1      | AA (1)                          | African American and African (1)                         |
| 17:43106487:A:C        | BRCA1 | Missense    | rs28897672   | c.181T>G              | p.Cys61Gly       | Pathogenic (3*)                      | 1      | EA (1)                          | Non-AJ European (1)                                      |
| 17:43115744:C:T        | BRCA1 | Missense    | rs80357498   | c.116G>A              | p.Cys39Tyr       | Pathogenic (2*)                      | 1      | M (1)                           |                                                          |
| 17:43124027:ACT:A      | BRCA1 | Frameshift  | rs80357914   | c.68_69delAG          | p.Glu23fs        | Pathogenic (3*)                      | 41     | EA (36), M (4), O (1)           | AJ (38)                                                  |
| 17:43124030:C:CT       | BRCA1 | Frameshift  | rs80357783   | c.66dupA              | p.Glu23fs        | Pathogenic (3*)                      | 1      | O (1)                           | Non-AJ European (1)                                      |
| 13:32319298:G:T        | BRCA2 | Stop gained | rs397507646  | c.289G>T              | p.Glu97Ter       | Pathogenic (3*)                      | 1      | O (1)                           | Non-AJ European (1)                                      |
| 13:32329467:CTG:C      | BRCA2 | Frameshift  | rs768580992  | c.658_659delGT        | p.Val220fs       | Pathogenic (3*)                      | 1      | EA (1)                          | Non-AJ European (1)                                      |
| 13:32330986:TGACA:T    | BRCA2 | Frameshift  | rs80359659   | c.755_758delACAG      | p.Asp252fs       | Pathogenic (3*)                      | 1      | EA (1)                          | Non-AJ European (1)                                      |
| 13:32331009:C:T        | BRCA2 | Stop gained | rs80358998   | c.772C>T              | p.Gln258Ter      | Pathogenic (3*)                      | 2      | EA (2)                          | Non-AJ European (2)                                      |
| 13:32332517:C:T        | BRCA2 | Stop gained |              | c.1039C>T             | p.Gln347Ter      | NA                                   | 1      | AA (1)                          | African American and African (1)                         |
| 13:32332778:AAAAG:A    | BRCA2 | Frameshift  | rs80359277   | c.1310_1313delAAGA    | p.Lys437fs       | Pathogenic (3*)                      | 1      | HA (1)                          | Ecuadorian (1)                                           |
| 13:32332862:G:T        | BRCA2 | Stop gained |              | c.1384G>T             | p.Glu462Ter      | NA                                   | 1      | AA (1)                          |                                                          |
| 13:32333165:TG:T       | BRCA2 | Frameshift  | rs876659278  | c.1689delG            | p.Trp563fs       | Pathogenic (3*)                      | 1      | EA (1)                          | Non-AJ European (1)                                      |
| 13:32333228:AAAAAG:A   | BRCA2 | Frameshift  | rs80359302   | c.1755_1759delGAAAA   | p.Lys585fs       | Pathogenic (3*)                      | 1      | EA (1)                          | Non-AJ European (1)                                      |
| 13:32333282:G:T        | BRCA2 | Stop gained |              | c.1804G>T             | p.Gly602Ter      | NA                                   | 1      | HA (1)                          | Puerto Rican (1)                                         |
| 13:32333363:CTTACATT:C | BRCA2 | Frameshift  | rs1555282146 | c.1887_1893delTACATTT | p.Thr630fs       | Pathogenic (3*)                      | 1      | AA (1)                          | African American and African (1)                         |
| 13:32336684:G:GA       | BRCA2 | Frameshift  | rs80359328   | c.2330dupA            | p.Asp777fs       | Pathogenic (3*)                      | 1      | EA (1)                          | Non-AJ European (1)                                      |
| 13:32336750:A:T        | BRCA2 | Stop gained |              | c.2395A>T             | p.Lys799Ter      | NA                                   | 1      | EA (1)                          | AJ (1)                                                   |
| 13:32336781:T:G        | BRCA2 | Stop gained | rs397507285  | c.2426T>G             | p.Leu809Ter      | Pathogenic (3*)                      | 1      | EA (1)                          | Non-AJ European (1)                                      |
| 13:32337055:TC:T       | BRCA2 | Frameshift  | rs397507637  | c.2701delC            | p.Ala902fs       | Pathogenic (3*)                      | 1      | HA (1)                          | Puerto Rican (1)                                         |
| 13:32337160:TA:T       | BRCA2 | Frameshift  | rs398122753  | c.2808del             | p.Lys936fs       | Pathogenic (3*)                      | 1      | AA (1)                          | African American and African (1)                         |
| 13:32337160:TAAAC:T    | BRCA2 | Frameshift  | rs80359351   | c.2808_2811delACAA    | p.Ala938fs       | Pathogenic (3*)                      | 1      | HA (1)                          | Central and South American (1)                           |
| 13:32337305:G:GA       | BRCA2 | Frameshift  | rs80359365   | c.2957dupA            | p.Asn986fs       | Pathogenic (3*)                      | 1      | EA (1)                          | Non-AJ European (1)                                      |
| 13:32337312:A:AG       | BRCA2 | Frameshift  | rs1555282969 | c.2957_2958insG       | p.Asn986fs       | Pathogenic (3*)                      | 1      | AA (1)                          | African American and African (1)                         |
| 13:32337952:CTG:C      | BRCA2 | Stop gained | rs80359391   | c.3599_3600delGT      | p.Cys1200Terfs   | Pathogenic (3*)                      | 1      | EA (1)                          | Non-AJ European (1)                                      |
| 13:32338034:CTG:C      | BRCA2 | Frameshift  | rs80359395   | c.3680_3681delTG      | p.Leu1227fs      | Pathogenic (3*)                      | 1      | AA (1)                          | African American and African (1)                         |
| 13:32338069:GA:G       | BRCA2 | Frameshift  | rs80359401   | c.3717delA            | p.Lys1239fs      | Pathogenic (3*)                      | 1      | EA (1)                          | Non-AJ European (1)                                      |
| 13:32338075:GT:G       | BRCA2 | Frameshift  | NA           | c.3723delT            | p.Phe1241fs      | Pathogenic (3*)                      | 1      | EA (1)                          | AJ (1)                                                   |

| CHR:POS:REF:ALT             | Gene  | Function    | rsID        | cDNA Position            | Protein Position | ClinVar Significance (Review Status) | # Hets | Self-Reported Ancestry (# Hets) | Genetic Ancestry (# Hets)                             |
|-----------------------------|-------|-------------|-------------|--------------------------|------------------|--------------------------------------|--------|---------------------------------|-------------------------------------------------------|
| 13:32338200:CTG:C           | BRCA2 | Frameshift  | rs80359405  | c.3847_3848delGT         | p.Val1283fs      | Pathogenic (3*)                      | 3      | EA (2), M (1)                   | Non-AJ European (2), African American and African (1) |
| 13:32338212:AAAAT:A         | BRCA2 | Frameshift  | rs80359410  | c.3860_3863delATAA       | p.Asn1287fs      | Pathogenic (3*)                      | 1      | O (1)                           | African American and African (1)                      |
| 13:32338277:G:T             | BRCA2 | Stop gained | rs80358638  | c.3922G>T                | p.Glu1308Ter     | Pathogenic (3*)                      | 8      | HA (8)                          | Puerto Rican (7)                                      |
| 13:32338565:TC:T            | BRCA2 | Stop gained | rs398122777 | c.4211delC               | p.Ser1404Terfs   | Pathogenic (3*)                      | 1      | AA (1)                          | African American and African (1)                      |
| 13:32338783:CA:C            | BRCA2 | Frameshift  | rs886040531 | c.4429delA               | p.Ile1477fs      | Pathogenic (3*)                      | 1      | EA (1)                          | Non-AJ European (1)                                   |
| 13:32338824:TACTG:T         | BRCA2 | Frameshift  | rs80359451  | c.4471_4474delCTGA       | p.Leu1491fs      | Pathogenic (3*)                      | 1      | AA (1)                          | African American and African (1)                      |
| 13:32338968:CT:C            | BRCA2 | Frameshift  |             | c.4616delT               | p.Leu1539fs      | NA                                   | 1      | HA (1)                          | Central and South American (1)                        |
| 13:32338981:GA:G            | BRCA2 | Frameshift  | rs80359461  | c.4631delA               | p.Asn1544fs      | Pathogenic (3*)                      | 1      | O (1)                           | Filipino and other Southeast Asian (1)                |
| 13:32338986:A:AG            | BRCA2 | Frameshift  |             | c.4631_4632insG          | p.Asn1544fs      | NA                                   | 1      | AA (1)                          |                                                       |
| 13:32339069:CCTG:GCAAA GACC | BRCA2 | Frameshift  |             | c.4716_4717delinsAAAGACC | p.Cys1573fs      | NA                                   | 1      | O (1)                           | Non-AJ European (1)                                   |
| 13:32339084:GA:G            | BRCA2 | Frameshift  | rs397507740 | c.4731delA               | p.Glu1577fs      | Pathogenic (3*)                      | 1      | AA (1)                          | African American and African (1)                      |
| 13:32339318:T:TA            | BRCA2 | Frameshift  | rs398122789 | c.4964dupA               | p.Tyr1655fs      | Pathogenic (3*)                      | 1      | EA (1)                          | Non-AJ European (1)                                   |
| 13:32339320:C:G             | BRCA2 | Stop gained | rs80358721  | c.4965C>G                | p.Tyr1655Ter     | Pathogenic (3*)                      | 1      | M (1)                           |                                                       |
| 13:32339394:CTG:C           | BRCA2 | Frameshift  | rs80359478  | c.5042_5043delTG         | p.Val1681fs      | Pathogenic (3*)                      | 1      | EA (1)                          | Non-AJ European (1)                                   |
| 13:32339421:C:CA            | BRCA2 | Frameshift  | rs80359479  | c.5073dupA               | p.Trp1692fs      | Pathogenic (3*)                      | 1      | EA (1)                          | Non-AJ European (1)                                   |
| 13:32339421:CA:C            | BRCA2 | Frameshift  | rs80359479  | c.5073delA               | p.Lys1691fs      | Pathogenic (3*)                      | 1      | HA (1)                          | Ecuadorian (1)                                        |
| 13:32339460:CAGAA:C         | BRCA2 | Frameshift  | NA          | c.5110_5113delAGAA       | p.Arg1704fs      | Pathogenic (3*)                      | 1      | EA (1)                          | Non-AJ European (1)                                   |
| 13:32339489:G:T             | BRCA2 | Stop gained | NA          | c.5134G>T                | p.Gly1712Ter     | Pathogenic (3*)                      | 1      | EA (1)                          | Non-AJ European (1)                                   |
| 13:32339571:ATTTAAGT:A      | BRCA2 | Frameshift  | rs80359496  | c.5217_5223delTTTAAGT    | p.Tyr1739fs      | Pathogenic (3*)                      | 1      | EA (1)                          | Non-AJ European (1)                                   |
| 13:32339699:C:CA            | BRCA2 | Frameshift  | rs80359507  | c.5351dupA               | p.Asn1784fs      | Pathogenic (3*)                      | 1      | M (1)                           | Non-AJ European (1)                                   |
| 13:32339699:CAA:C           | BRCA2 | Frameshift  | rs80359507  | c.5350_5351delAA         | p.Asn1784fs      | Pathogenic (3*)                      | 1      | EA (1)                          | Non-AJ European (1)                                   |
| 13:32339928:CAATT:C         | BRCA2 | Frameshift  | rs770318608 | c.5576_5579delTTAA       | p.Ile1859fs      | Pathogenic (3*)                      | 1      | ESA (1)                         | Filipino and other Southeast Asian (1)                |
| 13:32340128:C:T             | BRCA2 | Stop gained | rs80358806  | c.5773C>T                | p.Gln1925Ter     | Pathogenic (3*)                      | 1      | EA (1)                          | AJ (1)                                                |
| 13:32340149:CAT:C           | BRCA2 | Frameshift  | rs763890036 | c.5796_5797delTA         | p.His1932fs      | Pathogenic (3*)                      | 1      | EA (1)                          | Non-AJ European (1)                                   |
| 13:32340151:TAACC:T         | BRCA2 | Frameshift  | rs80359538  | c.5799_5802delCCAA       | p.Asn1933fs      | Pathogenic (3*)                      | 1      | HA (1)                          | Puerto Rican (1)                                      |
| 13:32340202:TGTTA:T         | BRCA2 | Frameshift  | rs80359543  | c.5851_5854delAGTT       | p.Ser1951fs      | Pathogenic (3*)                      | 2      | HA (2)                          | Dominican (2)                                         |
| 13:32340212:G:T             | BRCA2 | Stop gained | rs80358814  | c.5857G>T                | p.Glu1953Ter     | Pathogenic (3*)                      | 1      | AA (1)                          | African American and African (1)                      |
| 13:32340300:GT:G            | BRCA2 | Frameshift  | rs80359550  | c.5946delT               | p.Ser1982fs      | Pathogenic (3*)                      | 34     | EA (30), M (1), NA (1), O (2)   | AJ (30), Non-AJ European (1)                          |



| CHR:POS:REF:ALT     | Gene  | Function    | rsID         | cDNA Position       | Protein Position | ClinVar Significance (Review Status) | # Hets | Self-Reported Ancestry (# Hets) | Genetic Ancestry (# Hets)                             |
|---------------------|-------|-------------|--------------|---------------------|------------------|--------------------------------------|--------|---------------------------------|-------------------------------------------------------|
| 13:32340392:A:T     | BRCA2 | Stop gained | rs80358840   | c.6037A>T           | p.Lys2013Ter     | Pathogenic (3*)                      | 2      | EA (2)                          | Non-AJ European (2)                                   |
| 13:32340629:CTT:C   | BRCA2 | Frameshift  | rs11571658   | c.6275_6276delTT    | p.Leu2092fs      | Pathogenic (3*)                      | 1      | EA (1)                          |                                                       |
| 13:32340751:A:AT    | BRCA2 | Frameshift  | rs431825342  | c.6397dupT          | p.Ser2133fs      | Pathogenic (3*)                      | 1      | O (1)                           | Non-AJ European (1)                                   |
| 13:32340816:ATC:A   | BRCA2 | Frameshift  | rs80359596   | c.6468_6469delTC    | p.Gln2157fs      | Pathogenic (3*)                      | 2      | HA (1), O (1)                   | Non-AJ European (1)                                   |
| 13:32340836:GACAA:G | BRCA2 | Frameshift  | rs770263702  | c.6486_6489delACAA  | p.Lys2162fs      | Pathogenic (3*)                      | 1      | HA (1)                          | Central and South American (1)                        |
| 13:32340882:ACATT:A | BRCA2 | Frameshift  | rs397507865  | c.6531_6534delTCAT  | p.Ile2177fs      | Pathogenic (3*)                      | 1      | HA (1)                          | Central and South American (1)                        |
| 13:32340983:GAA:G   | BRCA2 | Frameshift  | rs80359611   | c.6629_6630delAA    | p.Glu2210fs      | Pathogenic (3*)                      | 1      | HA (1)                          | Central and South American (1)                        |
| 13:32340998:TACTC:T | BRCA2 | Frameshift  | rs80359616   | c.6644_6647delACTC  | p.Tyr2215fs      | Pathogenic (3*)                      | 1      | HA (1)                          | African American and African (1)                      |
| 13:32341035:C:CA    | BRCA2 | Frameshift  | rs1555284790 | c.6681dupA          | p.Val2228fs      | Pathogenic (3*)                      | 1      | HA (1)                          | Puerto Rican (1)                                      |
| 13:32354920:TTC:T   | BRCA2 | Frameshift  | rs756538291  | c.7069_7070delCT    | p.Leu2357fs      | Pathogenic (3*)                      | 1      | O (1)                           | Non-AJ European (1)                                   |
| 13:32355068:C:CT    | BRCA2 | Frameshift  | rs876659345  | c.7218dupT          | p.Val2407fs      | Pathogenic (3*)                      | 1      | EA (1)                          | AJ (1)                                                |
| 13:32355212:GA:G    | BRCA2 | Frameshift  | rs80359646   | c.7360delA          | p.Ile2454fs      | Pathogenic (3*)                      | 1      | EA (1)                          | Non-AJ European (1)                                   |
| 13:32355270:T:TTC   | BRCA2 | Frameshift  |              | c.7417_7418insTC    | p.Cys2473fs      | NA                                   | 1      | ESA (1)                         |                                                       |
| 13:32356463:C:T     | BRCA2 | Stop gained | rs80358971   | c.7471C>T           | p.Gln2491Ter     | Pathogenic (3*)                      | 2      | AA (2)                          | African American and African (2)                      |
| 13:32356472:C:T     | BRCA2 | Stop gained | rs80358972   | c.7480C>T           | p.Arg2494Ter     | Pathogenic (3*)                      | 2      | EA (1), HA (1)                  | Non-AJ European (1), Dominican (1)                    |
| 13:32356550:C:T     | BRCA2 | Stop gained | rs80358981   | c.7558C>T           | p.Arg2520Ter     | Pathogenic (3*)                      | 2      | AA (2)                          | African American and African (1)                      |
| 13:32357794:CAG:C   | BRCA2 | Frameshift  | rs80359672   | c.7673_7674delAG    | p.Glu2558fs      | Pathogenic (3*)                      | 1      | HA (1)                          | Filipino and other Southeast Asian (1)                |
| 13:32362626:GCCTT:G | BRCA2 | Frameshift  | rs80359686   | c.7913_7917delTTCCT | p.Phe2638fs      | Pathogenic (3*)                      | 1      | EA (1)                          | AJ (1)                                                |
| 13:32363498:AC:A    | BRCA2 | Frameshift  | rs80359705   | c.8297delC          | p.Thr2766fs      | Pathogenic (3*)                      | 1      | EA (1)                          | Non-AJ European (1)                                   |
| 13:32370483:TTA:T   | BRCA2 | Frameshift  | rs397507984  | c.8415_8416delAT    | p.Leu2805fs      | Pathogenic (3*)                      | 1      | AA (1)                          | African American and African (1)                      |
| 13:32379800:G:A     | BRCA2 | Missense    | rs80359152   | c.9004G>A           | p.Glu3002Lys     | Pathogenic/Likely pathogenic (2*)    | 2      | HA (1), ESA (1)                 | Dominican (1), Filipino and other Southeast Asian (1) |
| 13:32379913:G:A     | BRCA2 | Synonymous  | rs28897756   | c.9117G>A           | p.Pro3039=       | Pathogenic (2*)                      | 1      | EA (1)                          | Non-AJ European (1)                                   |
| 13:32380085:C:T     | BRCA2 | Stop gained | rs80359180   | c.9196C>T           | p.Gln3066Ter     | Pathogenic (3*)                      | 2      | AA (2)                          | African American and African (2)                      |
| 13:32380135:G:GA    | BRCA2 | Frameshift  | rs80359752   | c.9253dupA          | p.Thr3085fs      | Pathogenic (3*)                      | 3      | EA (2), AA (1)                  | AJ (1), Non-AJ European (2)                           |
| 13:32394726:C:G     | BRCA2 | Stop gained | rs80359200   | c.9294C>G           | p.Tyr3098Ter     | Pathogenic (3*)                      | 1      | AA (1)                          | African American and African (1)                      |
| 13:32394814:C:T     | BRCA2 | Stop gained | rs80359212   | c.9382C>T           | p.Arg3128Ter     | Pathogenic (3*)                      | 1      | M (1)                           | Non-AJ European (1)                                   |
| 13:32394842:C:CT    | BRCA2 | Frameshift  | rs876659435  | c.9413dupT          | p.Leu3138fs      | Pathogenic (3*)                      | 1      | EA (1)                          | Non-AJ European (1)                                   |
| 13:32394863:CTG:C   | BRCA2 | Frameshift  | rs80359763   | c.9435_9436delGT    | p.Ser3147fs      | Pathogenic (3*)                      | 1      | EA (1)                          | Non-AJ European (1)                                   |

**Abbreviations:** Hets, heterozygous carriers; AA, African American/African; AJ, Ashkenazi Jewish; EA, European; ESA, East/Southeast Asian; HA, Hispanic/Latino; M, multiple selected; NA, not available; O, other ancestry. cDNA and protein position provided for *BRCA1* ENST00000357654 (NM\_007294.3) and *BRCA2* ENST00000380152 (NM\_000059.3); Human reference genome build 38 (GRCh38).
